# Supplementary material for: Twenty-Month Monitoring of Humoral Immune Response to BNT162b2 Vaccine: Antibody Kinetics, Breakthrough Infections, and Adverse Effects
Source: MDPI journal article supplement (doi:10.3390/vaccines11101578), 2023-10-10
Supplement: s1 [file s1]

**Table S1.** IgG-NCP levels (bold positive results) at subsequent checkpoints for all individuals, by immune status ('vaccine only'/'hybrid' immunity), as well as by age (over/under 50 years).

| Checkpoint     |                 |                     |                                | I | II          | III         | IV           | V           | VI          | VII          |              |
|----------------|-----------------|---------------------|--------------------------------|---|-------------|-------------|--------------|-------------|-------------|--------------|--------------|
| Individuals    | Age (y)         | Gender <sup>a</sup> | IgG-NCP (RU/ml) <sup>b,*</sup> |   |             |             |              |             |             |              |              |
| Age < 50 years | Vaccine only    | 1                   | 37                             | F | 0.03        | 0.41        | <b>1.35*</b> | <b>1.28</b> | 0.03        | <b>1.07*</b> | <b>1.80*</b> |
|                |                 | 2                   | 31                             | M | 0.07        | 0.06        | 0.07         | 0.07        | 0.07        | <b>2.46*</b> | <b>2.92*</b> |
|                |                 | 3                   | 47                             | F | 0.07        | 0.08        | 0.07         | 0.07        | 0.07        | <b>1.15*</b> | 0.97         |
|                |                 | 4                   | 30                             | F | 0.10        | 0.11        | 0.10         | 0.10        | 0.10        | <b>4.10*</b> | 0.20         |
|                |                 | 5                   | 44                             | F | 0.37        | 0.34        | 0.37         | 0.37        | 0.37        | <b>2.90*</b> | 0.57         |
|                |                 | 6                   | 42                             | F | 0.10        | 0.11        | 0.10         | 0.09        | 0.10        | <b>2.80*</b> | 0.09         |
|                |                 | 7                   | 47                             | F | 0.15        | 0.34        | 0.15         | 0.12        | 0.15        | <b>1.87*</b> | ND           |
|                |                 | 8                   | 47                             | F | 0.10        | 0.11        | <b>3.00*</b> | <b>1.50</b> | 0.10        | 0.20         | 0.06         |
|                |                 | 9                   | 38                             | F | 0.06        | 0.04        | 0.06         | 0.04        | ND          | 0.25         | <b>1.13*</b> |
|                |                 | 10                  | 31                             | F | 0.12        | 0.11        | 0.12         | ND          | 0.12        | 0.17         | <b>1.79*</b> |
|                |                 | 11                  | 46                             | F | 0.12        | 0.12        | 0.12         | 0.12        | 0.12        | 0.16         | <b>1.76*</b> |
|                |                 | 12                  | 47                             | M | 0.07        | 0.09        | 0.07         | 0.09        | 0.07        | 0.14         | <b>4.14*</b> |
|                |                 | 13                  | 49                             | F | 0.10        | 0.12        | 0.10         | 0.12        | 0.10        | 0.12         | <b>1.86*</b> |
|                |                 | 14                  | 46                             | F | 0.09        | 0.09        | 0.09         | 0.09        | 0.09        | 0.10         | <b>1.15*</b> |
|                |                 | 15                  | 44                             | F | 0.27        | 0.27        | 0.27         | 0.27        | 0.27        | 0.25         | 0.25         |
|                |                 | 16                  | 30                             | M | 0.17        | 0.16        | 0.17         | 0.16        | 0.17        | 0.24         | 0.40         |
|                |                 | 17                  | 39                             | F | 0.41        | 0.27        | 0.41         | 0.27        | 0.41        | 0.22         | 0.26         |
|                |                 | 18                  | 26                             | F | 0.11        | 0.12        | 0.11         | 0.12        | 0.11        | 0.14         | 0.07         |
|                |                 | 19                  | 31                             | F | 0.09        | 0.09        | 0.09         | 0.09        | 0.09        | 0.13         | 0.11         |
|                |                 | 20                  | 29                             | F | 0.01        | 0.08        | 0.01         | 0.08        | 0.01        | 0.11         | 0.46         |
|                |                 | 21                  | 25                             | F | 0.09        | 0.07        | 0.09         | 0.07        | 0.09        | 0.10         | 0.10         |
|                |                 | 22                  | 34                             | F | 0.07        | 0.06        | 0.07         | 0.06        | 0.07        | 0.08         | 0.20         |
|                |                 | 23                  | 44                             | F | 0.31        | 0.07        | 0.31         | 0.07        | 0.31        | 0.06         | 0.18         |
|                |                 | 24                  | 35                             | F | 0.03        | 0.12        | 0.03         | 0.12        | 0.03        | 0.04         | 0.16         |
|                |                 | 25                  | 49                             | F | 0.04        | 0.05        | 0.04         | 0.05        | 0.04        | ND           | 0.04         |
|                |                 | 26                  | 40                             | M | 0.03        | 0.20        | 0.03         | 0.20        | 0.03        | 0.16         | ND           |
|                |                 | 27                  | 34                             | F | 0.07        | 0.07        | 0.07         | 0.07        | ND          | 0.13         | ND           |
|                |                 | 28                  | 26                             | F | 0.01        | 0.16        | 0.01         | 0.16        | 0.01        | 0.10         | ND           |
|                |                 | 29                  | 31                             | F | 0.06        | 0.06        | 0.06         | 0.06        | 0.06        | 0.08         | ND           |
|                |                 | 30                  | 42                             | F | 0.64        | 0.41        | 0.64         | 0.41        | 0.64        | 0.07         | ND           |
|                |                 | 31                  | 26                             | F | 0.58        | 0.27        | 0.58         | 0.27        | 0.58        | ND           | ND           |
|                |                 | 32                  | 27                             | F | 0.34        | 0.33        | <b>2.70*</b> | <b>1.20</b> | 0.34        | 0.26         | <b>1.23*</b> |
|                |                 | 33                  | 32                             | M | 0.04        | <b>2.85</b> | <b>1.25</b>  | 0.84        | ND          | ND           | ND           |
|                | Hybrid immunity | 34                  | 37                             | F | <b>3.52</b> | <b>2.75</b> | <b>2.17</b>  | <b>1.58</b> | 0.83        | <b>5.32*</b> | <b>2.17</b>  |
|                |                 | 35                  | 41                             | F | <b>1.11</b> | 0.65        | 0.55         | 0.45        | 0.07        | <b>4.77*</b> | <b>1.84</b>  |
|                |                 | 36                  | 26                             | F | <b>4.69</b> | <b>3.61</b> | <b>2.51</b>  | <b>1.02</b> | 0.06        | 0.26         | 0.52         |
|                |                 | 37                  | 33                             | F | <b>1.15</b> | 0.72        | 0.52         | 0.12        | 0.07        | 0.08         | 0.09         |
|                |                 | 38                  | 43                             | M | <b>1.41</b> | <b>1.12</b> | 0.12         | 0.12        | 0.12        | 0.08         | 0.07         |
|                |                 | 39                  | 27                             | M | <b>1.12</b> | 0.81        | 0.51         | 0.21        | 0.05        | ND           | 0.73         |
|                |                 | 40                  | 47                             | F | <b>1.68</b> | <b>1.19</b> | 0.75         | 0.04        | 0.20        | 0.70         | 0.58         |
|                |                 | 41                  | 44                             | F | <b>1.96</b> | <b>1.30</b> | 0.63         | 0.03        | 0.07        | 0.29         | 0.54         |
|                |                 | 42                  | 46                             | F | <b>1.74</b> | 0.70        | 0.15         | 0.07        | 0.16        | 0.11         | 0.37         |
|                |                 | 43                  | 47                             | F | <b>1.71</b> | <b>1.13</b> | 0.56         | 0.01        | 0.06        | 0.13         | 0.07         |
|                |                 | 44                  | 44                             | F | <b>4.79</b> | <b>1.13</b> | 0.06         | 0.06        | 0.41        | 0.06         | 0.06         |
|                |                 | 45                  | 43                             | M | <b>5.55</b> | <b>5.05</b> | <b>5.18</b>  | <b>4.63</b> | <b>3.25</b> | <b>2.28</b>  | ND           |
|                |                 | 46                  | 40                             | M | <b>1.73</b> | 0.94        | 0.63         | 0.53        | ND          | ND           | ND           |

|                |                 |    |    |   |             |              |             |             |             |              |              |
|----------------|-----------------|----|----|---|-------------|--------------|-------------|-------------|-------------|--------------|--------------|
| Age ≥ 50 years | Vaccine only    | 47 | 65 | M | 0.07        | 0.07         | 0.07        | 0.07        | 0.07        | <b>1.60*</b> | <b>4.33*</b> |
|                |                 | 48 | 57 | M | 0.05        | 0.06         | 0.05        | 0.05        | 0.05        | 0.08         | <b>4.06*</b> |
|                |                 | 49 | 56 | F | 0.05        | 0.06         | 0.05        | 0.05        | 0.05        | 0.09         | <b>3.33*</b> |
|                |                 | 50 | 52 | F | 0.83        | <b>2.86</b>  | <b>1.56</b> | 0.63        | 0.53        | 0.82         | <b>2.74*</b> |
|                |                 | 51 | 60 | F | 0.69        | 0.68         | 0.69        | 0.69        | 0.69        | 0.53         | <b>2.64*</b> |
|                |                 | 52 | 52 | F | 0.12        | 0.13         | 0.12        | 0.12        | 0.12        | 0.14         | <b>1.88*</b> |
|                |                 | 53 | 57 | F | 0.05        | 0.05         | 0.05        | 0.05        | 0.05        | 0.06         | <b>1.42*</b> |
|                |                 | 54 | 61 | F | 0.09        | 0.09         | 0.09        | 0.09        | 0.09        | ND           | 0.71         |
|                |                 | 55 | 54 | F | 0.08        | 0.08         | 0.08        | 0.08        | 0.08        | <b>1.48*</b> | 0.10         |
|                |                 | 56 | 50 | M | 0.06        | 0.06         | 0.06        | 0.06        | 0.06        | 0.07         | 0.86         |
|                |                 | 57 | 59 | F | 0.55        | 0.51         | 0.55        | 0.55        | 0.55        | 0.52         | 0.82         |
|                |                 | 58 | 55 | F | 0.03        | 0.22         | 0.03        | 0.03        | 0.03        | 0.32         | 0.82         |
|                |                 | 59 | 60 | M | 0.15        | 0.14         | 0.15        | 0.15        | 0.15        | 0.18         | 0.72         |
|                |                 | 60 | 51 | F | 0.06        | 0.06         | 0.06        | 0.06        | 0.06        | 0.09         | 0.65         |
|                |                 | 61 | 52 | F | 0.06        | 0.07         | 0.06        | 0.06        | 0.06        | 0.09         | 0.59         |
|                |                 | 62 | 59 | F | 0.12        | 0.10         | 0.12        | 0.12        | 0.12        | 0.19         | 0.47         |
|                |                 | 63 | 56 | F | 0.03        | 0.27         | 0.03        | 0.03        | 0.03        | 0.36         | 0.47         |
|                |                 | 64 | 60 | F | 0.04        | 0.08         | 0.04        | 0.04        | 0.04        | 0.11         | 0.41         |
|                |                 | 65 | 59 | F | 0.11        | 0.10         | 0.11        | 0.11        | 0.11        | 0.17         | 0.40         |
|                |                 | 66 | 53 | F | 0.04        | 0.04         | 0.04        | 0.04        | 0.04        | 0.09         | 0.26         |
|                |                 | 67 | 52 | M | 0.05        | 0.05         | 0.05        | 0.05        | 0.05        | 0.11         | 0.22         |
|                |                 | 68 | 61 | F | 0.06        | 0.06         | 0.06        | 0.06        | 0.06        | 0.10         | 0.19         |
|                |                 | 69 | 50 | F | 0.02        | 0.07         | 0.02        | 0.02        | 0.02        | 0.07         | 0.15         |
|                |                 | 70 | 54 | F | 0.09        | 0.08         | 0.09        | 0.09        | 0.09        | 0.10         | 0.13         |
|                |                 | 71 | 56 | M | 0.15        | 0.13         | 0.15        | 0.02        | 0.15        | 0.14         | 0.08         |
|                |                 | 72 | 57 | F | 0.07        | 0.10         | 0.07        | 0.15        | 0.07        | 0.09         | 0.06         |
|                |                 | 73 | 50 | F | 0.05        | 0.06         | 0.05        | 0.07        | ND          | 0.05         | 0.04         |
|                |                 | 74 | 53 | F | 0.08        | 0.09         | 0.08        | 0.05        | 0.08        | <b>1.35*</b> | ND           |
|                |                 | 75 | 68 | M | 0.10        | 0.10         | 0.10        | 0.08        | 0.10        | 0.16         | ND           |
|                |                 | 76 | 63 | F | 0.07        | 0.07         | 0.07        | 0.10        | 0.07        | 0.09         | ND           |
|                |                 | 77 | 58 | F | 0.03        | 0.05         | 0.03        | 0.07        | 0.03        | 0.07         | ND           |
|                |                 | 78 | 54 | F | 0.02        | <b>2.31</b>  | <b>1.54</b> | 1.02        | 0.02        | 0.30         | 0.11         |
|                | Hybrid immunity | 79 | 53 | F | <b>6.37</b> | <b>5.65</b>  | <b>4.70</b> | <b>3.15</b> | <b>2.25</b> | <b>1.72</b>  | <b>4.54*</b> |
|                |                 | 80 | 55 | F | <b>6.18</b> | <b>5.07</b>  | <b>4.50</b> | <b>3.26</b> | <b>2.84</b> | <b>1.17</b>  | <b>4.50*</b> |
|                |                 | 81 | 56 | F | <b>7.20</b> | <b>7.12</b>  | <b>7.00</b> | <b>5.63</b> | <b>4.60</b> | <b>4.12</b>  | <b>2.75</b>  |
|                |                 | 82 | 50 | F | <b>4.30</b> | <b>5.60*</b> | <b>3.92</b> | <b>2.19</b> | <b>1.75</b> | <b>1.09</b>  | 0.45         |
|                |                 | 83 | 51 | M | <b>1.22</b> | 0.80         | 0.67        | 0.57        | 0.67        | <b>5.38*</b> | <b>3.51</b>  |
|                |                 | 84 | 67 | M | <b>4.51</b> | <b>2.92</b>  | <b>2.18</b> | <b>1.45</b> | <b>1.25</b> | <b>1.14</b>  | 0.44         |
|                |                 | 85 | 53 | F | <b>1.82</b> | <b>2.84</b>  | <b>1.43</b> | <b>1.17</b> | 0.57        | 0.47         | <b>3.68*</b> |
|                |                 | 86 | 59 | F | <b>4.80</b> | <b>3.48</b>  | <b>2.38</b> | <b>1.41</b> | 0.77        | 0.87         | 0.55         |
|                |                 | 87 | 60 | F | <b>1.14</b> | <b>4.23*</b> | <b>3.16</b> | <b>1.52</b> | 0.73        | 0.63         | 0.20         |
|                |                 | 88 | 64 | F | <b>2.29</b> | <b>1.45</b>  | <b>1.61</b> | <b>1.11</b> | 0.75        | 0.85         | 0.39         |
|                |                 | 89 | 64 | F | <b>1.17</b> | 0.87         | 0.67        | 0.62        | 0.09        | 0.08         | 0.12         |
|                |                 | 90 | 65 | F | <b>1.15</b> | <b>3.51*</b> | <b>2.66</b> | <b>1.13</b> | 0.38        | 0.28         | ND           |
|                |                 | 91 | 80 | M | <b>4.34</b> | <b>2.79</b>  | <b>1.70</b> | <b>1.14</b> | 0.75        | <b>4.12*</b> | <b>3.78</b>  |

<sup>a</sup> M, male; F, female.

<sup>b</sup> ND, no data.

\* Results indicating breakthrough infections.
